# Supplementary material for: Impedimetric detection of 2,4,6-trinitrotoluene using surface-functionalized halloysite nanotubes
Source: Royal Society of Chemistry journal article supplement (doi:10.1039/d2ra02482a), 2022-01-01
Supplement: d2ra02482a1.pdf [file d2ra02482a1.pdf]

**Supporting Information**

**Impedimetric Detection of 2,4,6-Trinitrotoluene  
Using Surface-Functionalized Halloysite Nanotubes**

*Supak Pattaweepaiboon<sup>1</sup>, Varuntorn Pimpakoon<sup>1</sup>, Nattida Phongzithiganna<sup>1,2</sup>,*

*Weekit Sirisaksoontorn<sup>1,2</sup>, Kannika Jeamjumnunja<sup>1,2,\*</sup>, and Chaiya Prasittichai<sup>1,2,\*</sup>*

<sup>1</sup>Department of Chemistry, Faculty of Science, Kasetsart University, Bangkok 10900, Thailand

<sup>2</sup>Center of Excellence for Innovation in Chemistry, Faculty of Science, Kasetsart University,  
Bangkok 10900, Thailand

**Table S1.** Positions and assignments of the FTIR bands presented in the spectra of HNTs and HA.

| Wavenumber (cm <sup>-1</sup> ) |      | Assignments                                     |
|--------------------------------|------|-------------------------------------------------|
| HNTs                           | HA   |                                                 |
| 3695                           | 3695 | O–H stretching of outer-surface hydroxyl groups |
| 3622                           | 3622 | O–H stretching of inner hydroxyl groups         |
| –                              | 3456 | N–H stretching                                  |
| –                              | 2932 | C–H <sub>2</sub> symmetric stretching           |
| 1651                           | 1649 | O–H deformation of water                        |
| –                              | 1568 | deformation (scissoring) of N–H <sub>2</sub>    |
| –                              | 1487 | deformation (scissoring) of C–H <sub>2</sub>    |
| 1120                           | 1118 | perpendicular Si–O stretching                   |
| 1024                           | 1026 | in-plane Si–O stretching                        |
| 908                            | 908  | O–H deformation of inner hydroxyl groups        |
| 793                            | 793  | Si–O symmetric stretching                       |
| 752                            | 750  | perpendicular Si–O stretching                   |
| 681                            | 685  | perpendicular Si–O stretching                   |
| 525                            | 527  | deformation of Al–O–Si                          |
| 460                            | 463  | deformation of Si–O–Si                          |

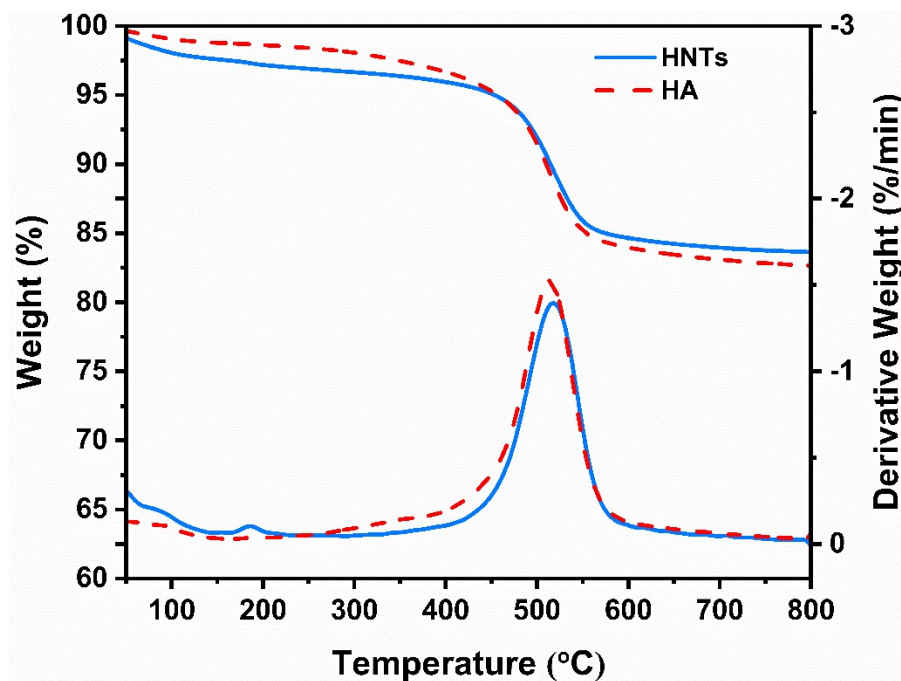

**Figure S1.** TGA and derivative thermogravimetric (DTG) curves of HNTs and HA.

**Table S2.** Weight losses of the HNTs and HA extracted from the TGA data.

| Temperature range (°C)                                  | % Weight loss |       |
|---------------------------------------------------------|---------------|-------|
|                                                         | HNTs          | HA    |
| 30–150                                                  | 2.18          | 1.05  |
| 250–800                                                 | 13.27         | 15.74 |
| <b>Grafting density<br/>(molecule/nm<sup>2</sup>)**</b> | -             | 6.74  |

\*\*The amount of APTES grafted onto the HNTs surface were calculated using the equation presented in our previous work.<sup>46</sup>

|            |                                                                                   |                                                                                   |                                                                                   |                                                                                   |                                                                                     |                                                                                     |                                                                                     |                                                                                     |                                                                                     |
|------------|-----------------------------------------------------------------------------------|-----------------------------------------------------------------------------------|-----------------------------------------------------------------------------------|-----------------------------------------------------------------------------------|-------------------------------------------------------------------------------------|-------------------------------------------------------------------------------------|-------------------------------------------------------------------------------------|-------------------------------------------------------------------------------------|-------------------------------------------------------------------------------------|
| <b>(a)</b> |  |  |  |  |  |  |  |  |  |
| <b>(b)</b> |  |  |  |  |  |  |  |  |  |
|            | Pure HA                                                                           | HA/TNT<br>$10^{-4}$ M                                                             | HA/TNT<br>$10^{-5}$ M                                                             | HA/TNT<br>$10^{-6}$ M                                                             | HA/TNT<br>$10^{-7}$ M                                                               | HA/TNT<br>$10^{-8}$ M                                                               | HA/TNT<br>$10^{-9}$ M                                                               | HA/TNT<br>$10^{-10}$ M                                                              | HA/TNT<br>$10^{-11}$ M                                                              |

**Figure S2.** (a) A gradual change in color to the red color of a Meisenheimer complex after the addition of different concentrations of TNT solution into HA powder. (b) The HA/TNT mixture in powder form after solvent evaporation.

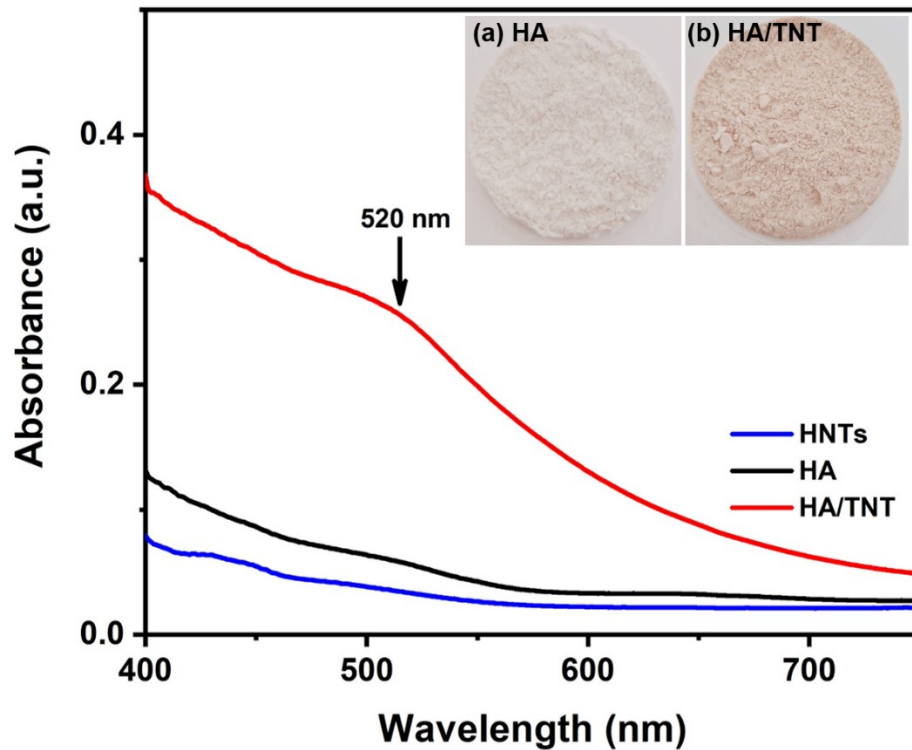

**Figure S3.** UV-vis absorption spectra of the powder samples of HNTs (blue line), HA (black line), and HA/TNT in the presence of  $10^{-4}$  M TNT (red line). The inset shows the photos of the (a) HA and (b) HA/TNT powder samples captured by a mobile camera in daylight; the white color of the HA powder turns to red of a Meisenheimer complex of HA/TNT.

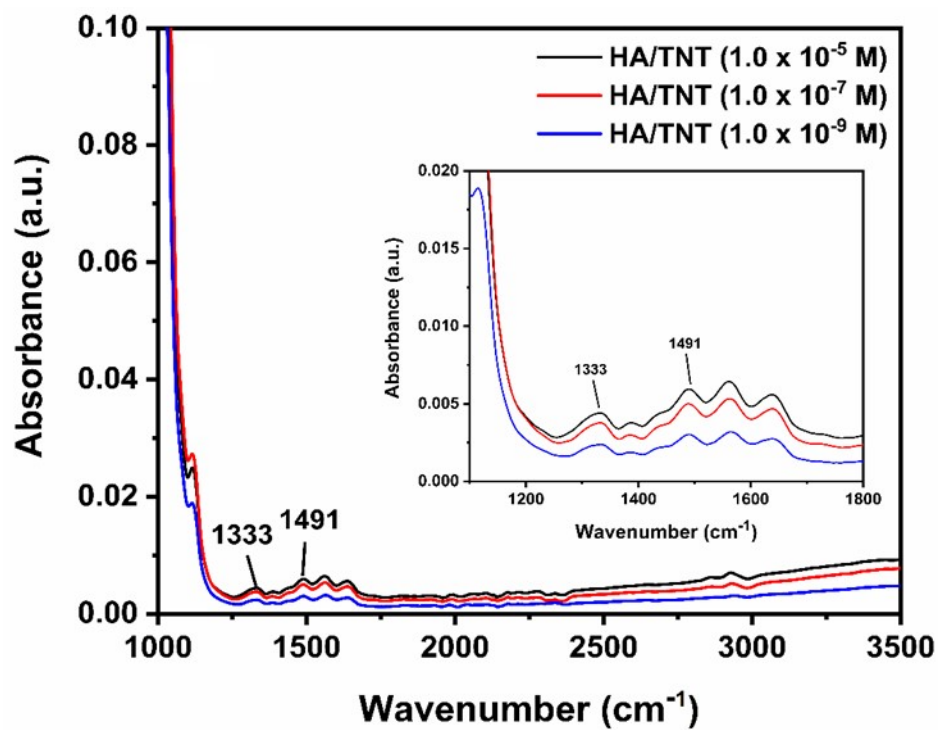

**Figure S4.** FTIR spectra of the powder products obtained from the reaction of APTES-modified HNTs (HA) and TNT at concentration of  $1.0 \times 10^{-9}$  M to  $1.0 \times 10^{-5}$  M. The baselines of all spectra were subtracted by the data of the pure HA.

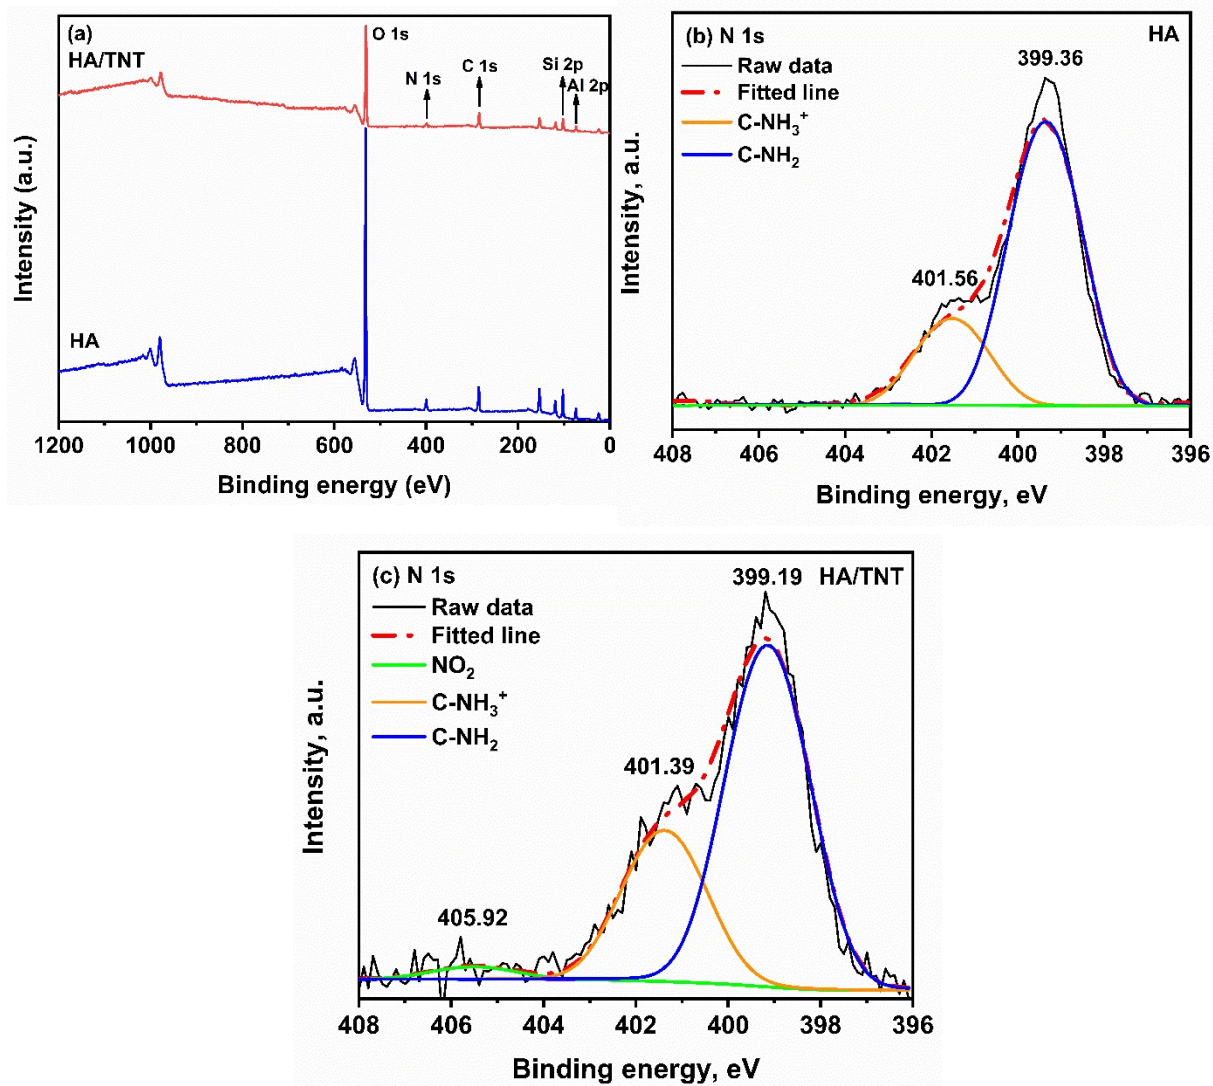

**Figure S5.** (a) Survey XPS spectra of the HA and HA/TNT with a TNT concentration of  $10^{-4}$  M, and high resolution XPS spectra of N 1s in (a) the HA and (b) HA/TNT.

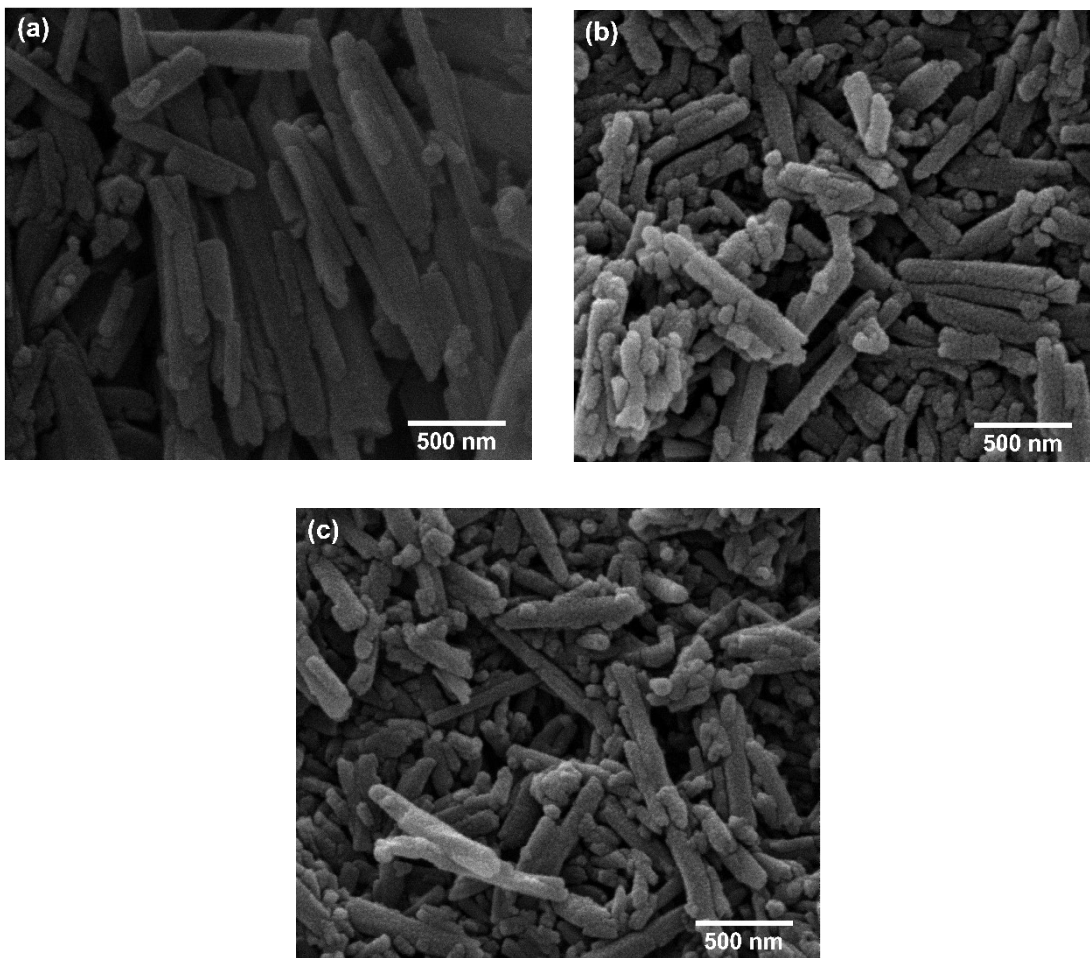

**Figure S6.** SEM images of (a) HNTs, (b) HA, and (c) HA/TNT with a TNT concentration of  $10^{-4}$  M.



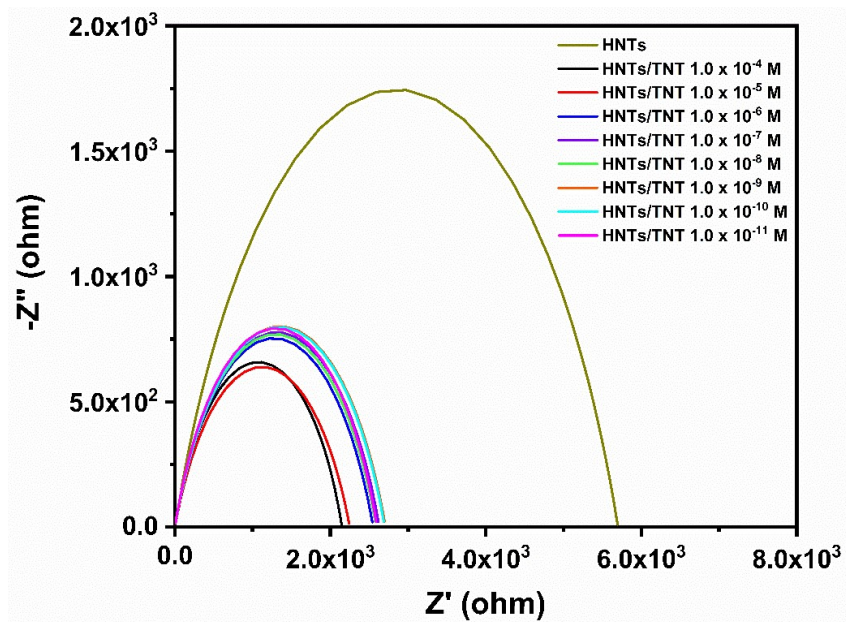

**Figure S7.** Nyquist plots of the bare HNTs and HNTs/TNT with presence of TNT in concentrations ranging from  $1.0 \times 10^{-11}$  M to  $1.0 \times 10^{-4}$  M.  $Z''$  and  $Z'$  are the imaginary and real parts of impedance, respectively. The impedance data were fitted to a Randles circuit model and only the fitted data are shown as solid lines.

**Table S3.** Resistance (R) of the HA plate electrodes with various structurally-related nitroaromatics at a concentration of  $1.0 \times 10^{-6}$  M. Three replications of all the experiments were performed using the same batch of samples.

| Material                   | Resistance (Ohm) |          |          |
|----------------------------|------------------|----------|----------|
|                            | Replication      | Mean     | SD       |
| HA<br>(control experiment) | (1) 2.25E+07     | 2.22E+07 | 0.03E+07 |
|                            | (2) 2.20E+07     |          |          |
|                            | (3) 2.20E+07     |          |          |
| TNT                        | (1) 0.54E+07     | 0.53E+07 | 0.02E+07 |
|                            | (2) 0.54E+07     |          |          |
|                            | (3) 0.50E+07     |          |          |
| 4-NP                       | (1) 1.11E+07     | 1.19E+07 | 0.09E+07 |
|                            | (2) 1.19E+07     |          |          |
|                            | (3) 1.29E+07     |          |          |
| 2,4-DNP                    | (1) 1.38E+07     | 1.39E+07 | 0.06E+07 |
|                            | (2) 1.46E+07     |          |          |
|                            | (3) 1.33E+07     |          |          |
| 2,6-DNT                    | (1) 1.90E+07     | 1.97E+07 | 0.12E+07 |
|                            | (2) 2.10E+07     |          |          |
|                            | (3) 1.90E+07     |          |          |

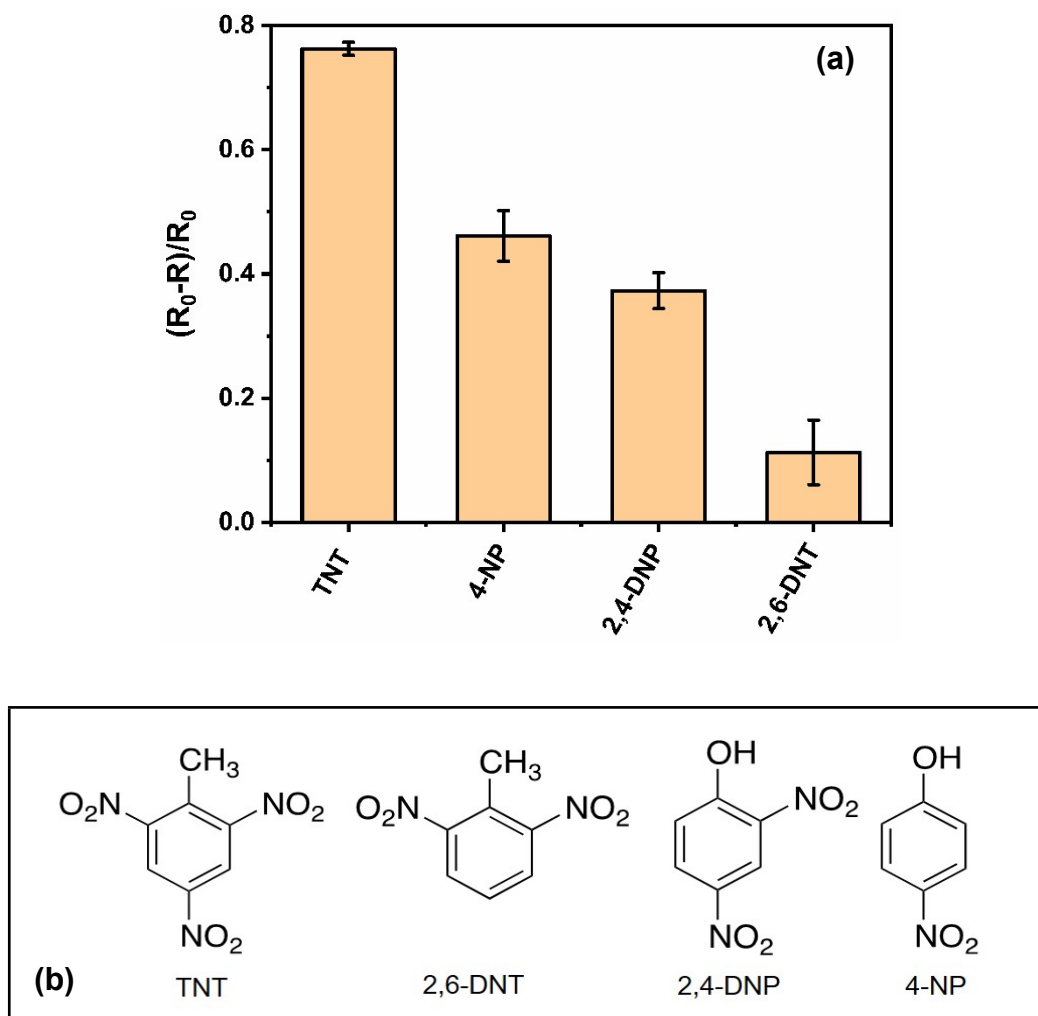

**Figure S8.** (a) Relative changes in the resistance of the HA plate electrodes with different nitroaromatics at a concentration of  $1.0 \times 10^{-6}$  M, where  $R_0$  and  $R$  denote the resistance of the HA plate electrode measured without and with nitroaromatics, respectively. All experiments were conducted in three replications using the same batch of HA samples. (b) Chemical structures of the nitroaromatic compounds used in this study: TNT, 2,6-dinitrotoluene (2,6-DNT), 2,4-dinitrophenol (2,4-DNP), and 4-nitrophenol (4-NP).

**Table S4.** Resistance (R) of the HA plate electrodes recorded during the TNT-binding/removal cycles. The TNT-binding cycles were conducted with a TNT concentration of  $1.0 \times 10^{-6}$  M.

Three replications of all the experiments were performed using the same batch of samples.

| Cycle | TNT removal |          |          | TNT binding |          |          |
|-------|-------------|----------|----------|-------------|----------|----------|
|       | R (Ohm)     | Mean     | SD       | R (Ohm)     | Mean     | SD       |
| 1     | 6.54E+07    | 6.48E+07 | 0.09E+07 | 5.52E+06    | 5.62E+06 | 0.13E+06 |
|       | 6.53E+07    |          |          | 5.77E+06    |          |          |
|       | 6.37E+07    |          |          | 5.56E+06    |          |          |
| 2     | 6.21E+07    | 6.10E+07 | 0.12E+07 | 5.77E+06    | 5.65E+06 | 0.20E+06 |
|       | 6.11E+07    |          |          | 5.42E+06    |          |          |
|       | 5.98E+07    |          |          | 5.78E+06    |          |          |
| 3     | 5.99E+07    | 5.95E+07 | 0.05E+07 | 5.40E+06    | 5.34E+06 | 0.15E+06 |
|       | 5.89E+07    |          |          | 5.17E+06    |          |          |
|       | 5.98E+07    |          |          | 5.45E+06    |          |          |
| 4     | 5.84E+07    | 5.76E+07 | 0.07E+07 | 5.34E+06    | 5.35E+06 | 0.26E+06 |
|       | 5.74E+07    |          |          | 5.09E+06    |          |          |
|       | 5.70E+07    |          |          | 5.61E+06    |          |          |
| 5     | 6.09E+07    | 6.25E+07 | 0.16E+07 | 5.18E+06    | 5.35E+06 | 0.16E+06 |
|       | 6.25E+07    |          |          | 5.51E+06    |          |          |
|       | 6.41E+07    |          |          | 5.36E+06    |          |          |
